# Supplementary material
Source: PubMed Central journal article supplement (PMC3747226)
Supplement: NIHMS450707-supplement-1.pdf [file NIHMS450707-supplement-1.pdf]

## **Supplemental Information**

### **Defining Influenza A Virus Hemagglutinin Antigenic Drift by Sequential Monoclonal Antibody Selection**

**Suman R. Das, Scott E. Hensley, William L. Ince, Christopher B. Brooke, Anju Subba, Mark G. Delboy, Gustav Russ, James S. Gibbs, Jack R. Bennink, and Jonathan W. Yewdell**

#### **Inventory of Supplemental Information:**

- 1) Figure S1: Egg titers of Sequential Variants (also see Figure 1).
- 2) Table S1: SEQ12 escape from PR8-neutralizing antibody response in vivo (also see Table 2)
- 3) Table S2: Functional interaction of H17-L10 and H17-L2 with escape mutants (also see Figure 4).
- 4) Table S3: Escape mutants selected by H17-L10 and H17-L2 in PR8, SEQ-7 and SEQ-8 Stocks (for compiled analysis also see Table 3).

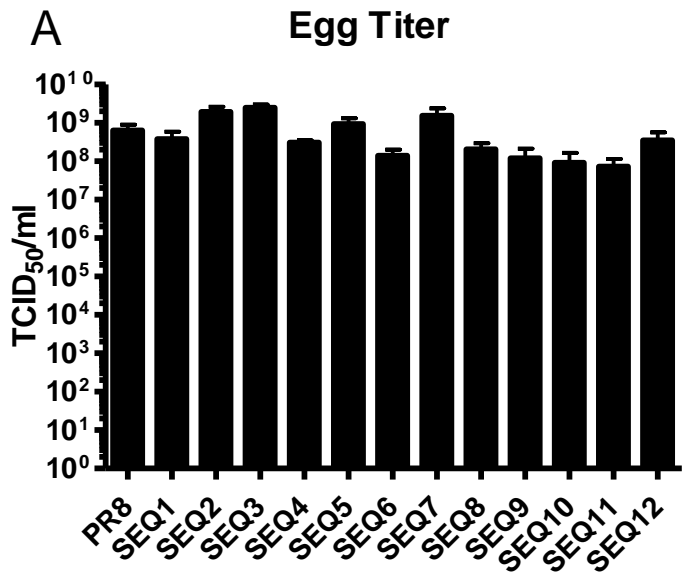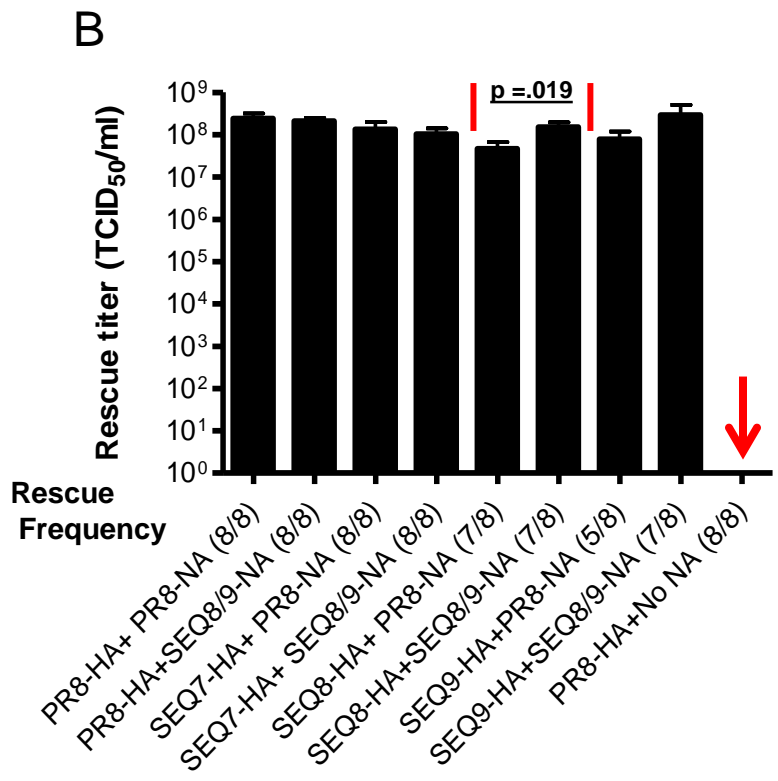

**Figure S1: Egg titers of Sequential Variants (also see Figure 1).** A. Egg titers of PR8 and Sequential variants were calculated as TCID<sub>50</sub>/ml. All experiments were performed in quadruplet. B. Recombinant viruses with *wt* PR8, SEQ7, 8 or 9 HA and PR8 or SEQ8/9 NA combinations were generated in 8 separate experiments. Titers of virus after amplifying in MDCK cells (P<sub>1</sub>-M passage) are shown with p values (Students's T test). Data are represented as mean +/- SEM. Rescue success is shown in the 8 experiments is shown in parentheses.

**Table S1. SEQ12 escape from PR8-neutralizing antibody response in vivo (also see Table 2)**

| Virus sample | immunization <sup>a</sup> | HI titer (PR8) | Lung viral titer (Log <sub>10</sub> ) <sup>b</sup> | % Seq. 12 (N) <sup>c</sup> | P value <sup>d</sup> |
|--------------|---------------------------|----------------|----------------------------------------------------|----------------------------|----------------------|
| Input        | --                        | --             | --                                                 | 20 (41)                    |                      |
| Mouse #      |                           |                |                                                    |                            |                      |
| 1            | PR8                       | 160            | 5.9                                                | 100 (30)                   | <0.0001              |
| 2            | PR8                       | 80             | 6.2                                                | 100 (29)                   | <0.0001              |
| 3            | PR8                       | 160            | 6.7                                                | 100 (26)                   | <0.0001              |
| 4            | PR8                       | 320            | 6.0                                                | 100 (30)                   | <0.0001              |
| 5            | PR8                       | 160            | 7.1                                                | 100 (30)                   | <0.0001              |
| 6            | MOCK                      | <20            | 7.9                                                | 5 (22)                     | 0.14                 |
| 7            | MOCK                      | <20            | 7.9                                                | 16 (19)                    | 1.00                 |
| 8            | MOCK                      | <20            | 7.3                                                | 0 (24)                     | 0.02                 |
| 9            | MOCK                      | <20            | 8.1                                                | 9 (23)                     | 0.31                 |
| 10           | MOCK                      | <20            | 6.4                                                | 6 (47)                     | 0.10                 |

a2000 HAUs of formaldehyde-inactivated PR8 virus injected I.P. 3 weeks pre-challenge.  
bTCID<sub>50</sub>s per 100mg of lung tissue.cGenotype of plaque-cloned variants sampled from each mouse determined by sequencing and tabulated as number of sequences.  
dFisher's exact test for differences in SEQ-12 and WT- PR8 frequencies relative to input.

**Table S2. Functional interaction of H17-L10 and H17-L2 with escape mutants (also see Figure 4).**

| Virus | H17-L10          |          | H17-L2           |          |
|-------|------------------|----------|------------------|----------|
|       | Micro-Neut Titer | HI Titer | Micro-Neut Titer | HI Titer |
| PR8   | 17,066           | 900      | 10,240           | 300      |
| SEQ-7 | 7,680            | 1200     | 16,700           | 800      |

Data represent the arithmetic mean of quadruplicate samples.

**Table S3. Escape mutants selected by H17-L10 and H17-L2 in PR8, SEQ-7 and SEQ-8 Stocks (for compiled analysis also see Table 3)**

| No of Mutant | Name | Origin | Selecting Antibody | Cell-Type | HA           |
|--------------|------|--------|--------------------|-----------|--------------|
| 1            | F14  | PR8-WG | H17-L10            | MDCK      | S207L        |
| 2            | F15  | PR8-WG | H17-L10            | MDCK      | I93T         |
| 3            | F16  | PR8-WG | H17-L10            | MDCK      | G240E, D241N |
| 4            | F17  | PR8-WG | H17-L10            | MDCK      | G173E        |
| 5            | F18  | PR8-WG | H17-L10            | MDCK      | G240R        |
| 6            | F21  | PR8-WG | H17-L10            | MDCK      | D241N        |
| 7            | F22  | PR8-WG | H17-L10            | MDCK      | E141K, G240E |
| 8            | F23  | PR8-WG | H17-L10            | MDCK      | E141K, G240E |
| 9            | F24  | PR8-WG | H17-L10            | MDCK      | G240R        |
| 10           | F25  | PR8-WG | H17-L10            | MDCK      | G240R        |
| 11           | F26  | PR8-WG | H17-L10            | MDCK      | G240R        |
| 12           | F27  | PR8-WG | H17-L10            | MDCK      | S207L        |
| 13           | F28  | PR8-WG | H17-L10            | MDCK      | G173R        |
| 14           | F29  | PR8-WG | H17-L10            | MDCK      | G240R        |
| 15           | F30  | PR8-WG | H17-L10            | MDCK      | G173R        |
| 16           | F31  | PR8-WG | H17-L10            | MDCK      | G240E        |
| 17           | F32  | PR8-WG | H17-L10            | MDCK      | G240R        |
| 18           | F33  | PR8-WG | H17-L10            | MDCK      | G240R, D241N |
| 19           | F34  | PR8-WG | H17-L10            | MDCK      | V223R, G240R |
| 20           | F35  | PR8-WG | H17-L10            | MDCK      | G173R        |
| 21           | F36  | PR8-WG | H17-L10            | MDCK      | G173E        |
| 22           | F37  | PR8-WG | H17-L10            | MDCK      | G240R        |
| 23           | F38  | PR8-WG | H17-L10            | MDCK      | G173R        |
| 24           | F39  | PR8-WG | H17-L10            | MDCK      | G173R        |
| 25           | F40  | PR8-WG | H17-L10            | MDCK      | G240E        |
| 26           | F41  | PR8-WG | H17-L10            | MDCK      | S207L        |
| 27           | F42  | PR8-WG | H17-L10            | MDCK      | G173R, P186S |
| 28           | F43  | PR8-WG | H17-L10            | MDCK      | G173E        |
| 29           | F44  | PR8-WG | H17-L10            | MDCK      | S207L        |
| 30           | F45  | PR8-WG | H17-L10            | MDCK      | S207L        |
| 31           | F46  | PR8-WG | H17-L10            | MDCK      | S207L        |
| 32           | F47  | PR8-WG | H17-L10            | MDCK      | K222Q, D241N |
| 33           | F48  | PR8-WG | H17-L10            | MDCK      | G173R, P186S |
| 34           | F49  | PR8-WG | H17-L10            | MDCK      | G173E        |
| 35           | F50  | PR8-WG | H17-L10            | MDCK      | G240E        |
| 36           | F51  | PR8-WG | H17-L10            | MDCK      | G173R        |
| 37           | F52  | PR8-WG | H17-L10            | MDCK      | G173W        |
| 38           | F53  | PR8-WG | H17-L10            | MDCK      | G240E        |

|    |     |        |         |      |                     |
|----|-----|--------|---------|------|---------------------|
| 39 | F54 | PR8-WG | H17-L10 | MDCK | S207L               |
| 40 | F55 | PR8-WG | H17-L10 | MDCK | G240R               |
| 41 | F56 | PR8-WG | H17-L10 | MDCK | G240R               |
| 42 | F57 | PR8-WG | H17-L10 | MDCK | G240R               |
| 43 | F58 | PR8-WG | H17-L10 | MDCK | G240R               |
| 44 | F59 | PR8-WG | H17-L10 | MDCK | G240R               |
| 45 | F60 | PR8-WG | H17-L10 | MDCK | G173R               |
| 46 | F62 | PR8-WG | H17-L10 | MDCK | G240E               |
| 47 | F63 | PR8-WG | H17-L10 | MDCK | G240R               |
| 48 | F64 | PR8-WG | H17-L10 | MDCK | G173R               |
| 49 | F65 | PR8-WG | H17-L10 | MDCK | E141K, G240E        |
| 50 | F66 | PR8-WG | H17-L10 | MDCK | G173R               |
| 51 | F67 | PR8-WG | H17-L10 | MDCK | V169M               |
| 52 | F68 | PR8-WG | H17-L10 | MDCK | G240R               |
| 53 | F69 | PR8-WG | H17-L10 | MDCK | G240R               |
| 54 | F70 | PR8-WG | H17-L10 | MDCK | S125R, G240R        |
| 55 | F71 | PR8-WG | H17-L10 | MDCK | G240E               |
| 56 | F72 | PR8-WG | H17-L10 | MDCK | G173R, I217M        |
| 57 | J1  | PR8-WG | H17-L10 | MDCK | G240R               |
| 58 | J2  | PR8-WG | H17-L10 | MDCK | G240R               |
| 59 | J3  | PR8-WG | H17-L10 | MDCK | G173R               |
| 60 | J4  | PR8-WG | H17-L10 | MDCK | G240R               |
| 61 | J5  | PR8-WG | H17-L10 | MDCK | E142K, N210S        |
| 62 | J6  | PR8-WG | H17-L10 | MDCK | V169E               |
| 63 | J7  | PR8-WG | H17-L10 | MDCK | T206I               |
| 64 | J8  | PR8-WG | H17-L10 | MDCK | N208S               |
| 65 | J9  | PR8-WG | H17-L10 | MDCK | K172T, P186S        |
| 66 | J10 | PR8-WG | H17-L10 | MDCK | G173R, R224K        |
| 67 | J13 | PR8-WG | H17-L10 | MDCK | S207P               |
| 68 | J14 | PR8-WG | H17-L10 | MDCK | S207P               |
| 69 | J16 | PR8-WG | H17-L10 | MDCK | G173E               |
| 70 | J17 | PR8-WG | H17-L10 | MDCK | D241Y               |
| 71 | J18 | PR8-WG | H17-L10 | MDCK | G240R               |
| 72 | J19 | PR8-WG | H17-L10 | MDCK | I93T                |
| 73 | J20 | PR8-WG | H17-L10 | MDCK | S207P               |
| 74 | J21 | PR8-WG | H17-L10 | MDCK | D241Y               |
| 75 | J22 | PR8-WG | H17-L10 | MDCK | V169A               |
| 76 | J23 | PR8-WG | H17-L10 | MDCK | G173R, P186S        |
| 77 | J24 | PR8-WG | H17-L10 | MDCK | G240R               |
| 78 | J25 | PR8-WG | H17-L10 | MDCK | G240R               |
| 79 | J26 | PR8-WG | H17-L10 | MDCK | P186S, S207P, R262K |
| 80 | J27 | PR8-WG | H17-L10 | MDCK | E142K, G240E        |
| 81 | J28 | PR8-WG | H17-L10 | MDCK | G240E               |

|     |     |        |         |      |              |
|-----|-----|--------|---------|------|--------------|
| 82  | J29 | PR8-WG | H17-L10 | MDCK | V169A        |
| 83  | J30 | PR8-WG | H17-L10 | MDCK | G173R, P186S |
| 84  | J31 | PR8-WG | H17-L10 | MDCK | I93T         |
| 85  | J32 | PR8-WG | H17-L10 | MDCK | V169A        |
| 86  | J33 | PR8-WG | H17-L10 | MDCK | E142K, G240E |
| 87  | J34 | PR8-WG | H17-L10 | MDCK | S207P        |
| 88  | J35 | PR8-WG | H17-L10 | MDCK | G240R        |
| 89  | J36 | PR8-WG | H17-L10 | MDCK | G240R        |
| 90  | J37 | PR8-WG | H17-L10 | MDCK | G173E        |
| 91  | J38 | PR8-WG | H17-L10 | MDCK | S207L        |
| 92  | J39 | PR8-WG | H17-L10 | MDCK | I93T         |
| 93  | J40 | PR8-WG | H17-L10 | MDCK | E124G, G240R |
| 94  | J41 | PR8-WG | H17-L10 | MDCK | G240R        |
| 95  | J42 | PR8-WG | H17-L10 | MDCK | S140P, G173R |
| 96  | J43 | PR8-WG | H17-L10 | MDCK | S207L        |
| 97  | J44 | PR8-WG | H17-L10 | MDCK | G173R        |
| 98  | J46 | PR8-WG | H17-L10 | MDCK | G240R        |
| 99  | J47 | PR8-WG | H17-L10 | MDCK | V169M        |
| 100 | J48 | PR8-WG | H17-L10 | MDCK | G173E        |
| 101 | J49 | PR8-WG | H17-L10 | MDCK | T242K        |
| 102 | J50 | PR8-WG | H17-L10 | MDCK | G240R        |
| 103 | J51 | PR8-WG | H17-L10 | MDCK | G240R        |
| 104 | J52 | PR8-WG | H17-L10 | MDCK | F99L, S207P  |
| 105 | J53 | PR8-WG | H17-L10 | MDCK | G240R        |
| 106 | J54 | PR8-WG | H17-L10 | MDCK | G240R        |
| 107 | J56 | PR8-WG | H17-L10 | MDCK | G173E        |
| 108 | J57 | PR8-WG | H17-L10 | MDCK | G240R        |
| 109 | J59 | PR8-WG | H17-L10 | MDCK | S207L        |
| 110 | J60 | PR8-WG | H17-L10 | MDCK | G173R        |
| 111 | J61 | PR8-WG | H17-L10 | MDCK | I93T         |
| 112 | J62 | PR8-WG | H17-L10 | MDCK | A218T        |
| 113 | J63 | PR8-WG | H17-L10 | MDCK | G240R        |
| 114 | J64 | PR8-WG | H17-L10 | MDCK | S207L, P186S |
| 115 | J65 | PR8-WG | H17-L10 | MDCK | G173R        |
| 116 | J66 | PR8-WG | H17-L10 | MDCK | V169A        |
| 117 | J67 | PR8-WG | H17-L10 | MDCK | E142K,G240E  |
| 118 | J68 | PR8-WG | H17-L10 | MDCK | G240E        |
| 119 | J70 | PR8-WG | H17-L10 | MDCK | S271L        |
| 120 | J71 | PR8-WG | H17-L10 | MDCK | G240E, A247T |
| 121 | J72 | PR8-WG | H17-L10 | MDCK | G240R        |

|   |     |        |        |      |       |
|---|-----|--------|--------|------|-------|
| 1 | F73 | PR8-WG | H17-L2 | MDCK | G240R |
| 2 | F74 | PR8-WG | H17-L2 | MDCK | G240R |

|    |      |        |        |      |              |
|----|------|--------|--------|------|--------------|
| 3  | F75  | PR8-WG | H17-L2 | MDCK | S207L        |
| 4  | F76  | PR8-WG | H17-L2 | MDCK | G173R        |
| 5  | F77  | PR8-WG | H17-L2 | MDCK | T242K        |
| 6  | F78  | PR8-WG | H17-L2 | MDCK | G173E        |
| 7  | F79  | PR8-WG | H17-L2 | MDCK | G173E        |
| 8  | F80  | PR8-WG | H17-L2 | MDCK | S207L        |
| 9  | F81  | PR8-WG | H17-L2 | MDCK | G240R        |
| 10 | F82  | PR8-WG | H17-L2 | MDCK | G240R        |
| 11 | F83  | PR8-WG | H17-L2 | MDCK | L152P        |
| 12 | F84  | PR8-WG | H17-L2 | MDCK | G240E        |
| 13 | F86  | PR8-WG | H17-L2 | MDCK | S207L        |
| 14 | F87  | PR8-WG | H17-L2 | MDCK | S207L        |
| 15 | F88  | PR8-WG | H17-L2 | MDCK | G173R        |
| 16 | F89  | PR8-WG | H17-L2 | MDCK | G240R        |
| 17 | F91  | PR8-WG | H17-L2 | MDCK | G240R        |
| 18 | F92  | PR8-WG | H17-L2 | MDCK | G173R        |
| 19 | F93  | PR8-WG | H17-L2 | MDCK | G173R        |
| 20 | F94  | PR8-WG | H17-L2 | MDCK | G240R        |
| 21 | F95  | PR8-WG | H17-L2 | MDCK | P127S, G173R |
| 22 | F97  | PR8-WG | H17-L2 | MDCK | G173E        |
| 23 | F98  | PR8-WG | H17-L2 | MDCK | E142K, G240E |
| 24 | F99  | PR8-WG | H17-L2 | MDCK | G173R, I217M |
| 25 | F100 | PR8-WG | H17-L2 | MDCK | G173R        |
| 26 | F101 | PR8-WG | H17-L2 | MDCK | G240E        |
| 27 | F102 | PR8-WG | H17-L2 | MDCK | G173E, E124G |
| 28 | F103 | PR8-WG | H17-L2 | MDCK | G173R        |
| 29 | F104 | PR8-WG | H17-L2 | MDCK | G240R        |
| 30 | F105 | PR8-WG | H17-L2 | MDCK | G240R        |
| 31 | F106 | PR8-WG | H17-L2 | MDCK | G173R        |
| 32 | F107 | PR8-WG | H17-L2 | MDCK | I93T         |
| 33 | F109 | PR8-WG | H17-L2 | MDCK | G240E, A247T |
| 34 | F110 | PR8-WG | H17-L2 | MDCK | G240R        |
| 35 | F111 | PR8-WG | H17-L2 | MDCK | S207L        |
| 36 | F112 | PR8-WG | H17-L2 | MDCK | V169M        |
| 37 | F113 | PR8-WG | H17-L2 | MDCK | G173R, S207P |
| 38 | F114 | PR8-WG | H17-L2 | MDCK | S207P, G240E |
| 39 | F116 | PR8-WG | H17-L2 | MDCK | G240E        |
| 40 | F117 | PR8-WG | H17-L2 | MDCK | S140P, G173E |
| 41 | F118 | PR8-WG | H17-L2 | MDCK | S124G, S207P |
| 42 | F119 | PR8-WG | H17-L2 | MDCK | D241N        |
| 43 | F120 | PR8-WG | H17-L2 | MDCK | G240R        |
| 44 | F121 | PR8-WG | H17-L2 | MDCK | S207L        |
| 45 | F122 | PR8-WG | H17-L2 | MDCK | G173R        |



|    |      |        |        |      |              |
|----|------|--------|--------|------|--------------|
| 46 | F123 | PR8-WG | H17-L2 | MDCK | G240R        |
| 47 | F124 | PR8-WG | H17-L2 | MDCK | G240R        |
| 48 | F125 | PR8-WG | H17-L2 | MDCK | G240R        |
| 49 | F126 | PR8-WG | H17-L2 | MDCK | D241N        |
| 50 | F127 | PR8-WG | H17-L2 | MDCK | S207P        |
| 51 | F128 | PR8-WG | H17-L2 | MDCK | E124G, G240R |
| 52 | F130 | PR8-WG | H17-L2 | MDCK | G240R        |
| 53 | F131 | PR8-WG | H17-L2 | MDCK | G240R        |
| 54 | F132 | PR8-WG | H17-L2 | MDCK | G240R        |
| 55 | J73  | PR8-WG | H17-L2 | MDCK | V169A, R262K |
| 56 | J74  | PR8-WG | H17-L2 | MDCK | G173R        |
| 57 | J75  | PR8-WG | H17-L2 | MDCK | G240R        |
| 58 | J76  | PR8-WG | H17-L2 | MDCK | G240R        |
| 59 | J77  | PR8-WG | H17-L2 | MDCK | T242K        |
| 60 | J78  | PR8-WG | H17-L2 | MDCK | S207L, R224K |
| 61 | J79  | PR8-WG | H17-L2 | MDCK | S207L        |
| 62 | J80  | PR8-WG | H17-L2 | MDCK | V169M        |
| 63 | J81  | PR8-WG | H17-L2 | MDCK | S207L        |
| 64 | J82  | PR8-WG | H17-L2 | MDCK | G240R        |
| 65 | J83  | PR8-WG | H17-L2 | MDCK | G240R        |
| 66 | J84  | PR8-WG | H17-L2 | MDCK | G240R        |
| 67 | J85  | PR8-WG | H17-L2 | MDCK | G240R        |
| 68 | J86  | PR8-WG | H17-L2 | MDCK | G240R        |
| 69 | J89  | PR8-WG | H17-L2 | MDCK | P186S, S207L |
| 70 | J90  | PR8-WG | H17-L2 | MDCK | T242K        |
| 71 | J91  | PR8-WG | H17-L2 | MDCK | V169A        |
| 72 | J92  | PR8-WG | H17-L2 | MDCK | G240R        |
| 73 | J93  | PR8-WG | H17-L2 | MDCK | I93T         |
| 74 | J94  | PR8-WG | H17-L2 | MDCK | V169M        |
| 75 | J95  | PR8-WG | H17-L2 | MDCK | G240R        |
| 76 | J96  | PR8-WG | H17-L2 | MDCK | G173R        |
| 77 | J97  | PR8-WG | H17-L2 | MDCK | G173R, I244M |
| 78 | J98  | PR8-WG | H17-L2 | MDCK | E124G, S207P |
| 79 | J99  | PR8-WG | H17-L2 | MDCK | G240R        |
| 80 | J100 | PR8-WG | H17-L2 | MDCK | G240E        |
| 81 | J101 | PR8-WG | H17-L2 | MDCK | G173R        |
| 82 | J102 | PR8-WG | H17-L2 | MDCK | G240R        |
| 83 | J103 | PR8-WG | H17-L2 | MDCK | E142K, G240E |
| 84 | J104 | PR8-WG | H17-L2 | MDCK | P186S, S207L |
| 85 | J105 | PR8-WG | H17-L2 | MDCK | S207L        |
| 86 | J106 | PR8-WG | H17-L2 | MDCK | T242K        |
| 87 | J107 | PR8-WG | H17-L2 | MDCK | G173R, P186S |
| 88 | J108 | PR8-WG | H17-L2 | MDCK | V169A        |

|     |      |        |        |      |              |
|-----|------|--------|--------|------|--------------|
| 89  | J109 | PR8-WG | H17-L2 | MDCK | S207L        |
| 90  | J110 | PR8-WG | H17-L2 | MDCK | G240R        |
| 91  | J111 | PR8-WG | H17-L2 | MDCK | V169A, E219D |
| 92  | J112 | PR8-WG | H17-L2 | MDCK | V169A        |
| 93  | J113 | PR8-WG | H17-L2 | MDCK | G173E        |
| 94  | J114 | PR8-WG | H17-L2 | MDCK | V169A        |
| 95  | J116 | PR8-WG | H17-L2 | MDCK | D241N        |
| 96  | J118 | PR8-WG | H17-L2 | MDCK | S207L        |
| 97  | J121 | PR8-WG | H17-L2 | MDCK | G240R        |
| 98  | J122 | PR8-WG | H17-L2 | MDCK | G173R, P186S |
| 99  | J124 | PR8-WG | H17-L2 | MDCK | G173W, P186S |
| 100 | J125 | PR8-WG | H17-L2 | MDCK | G240R        |
| 101 | J126 | PR8-WG | H17-L2 | MDCK | S207L        |
| 102 | J127 | PR8-WG | H17-L2 | MDCK | G240E        |
| 103 | J128 | PR8-WG | H17-L2 | MDCK | V169A        |
| 104 | J130 | PR8-WG | H17-L2 | MDCK | G240R        |
| 105 | J132 | PR8-WG | H17-L2 | MDCK | V169A        |
| 106 | J134 | PR8-WG | H17-L2 | MDCK | G240R        |
| 107 | J136 | PR8-WG | H17-L2 | MDCK | G173R        |
| 108 | J137 | PR8-WG | H17-L2 | MDCK | G173R, S186P |
| 109 | J138 | PR8-WG | H17-L2 | MDCK | S207L, Y256F |
| 110 | J139 | PR8-WG | H17-L2 | MDCK | R224K, G240E |
| 111 | J140 | PR8-WG | H17-L2 | MDCK | G240E        |
| 112 | J142 | PR8-WG | H17-L2 | MDCK | V169A        |
| 113 | J143 | PR8-WG | H17-L2 | MDCK | G173W        |
| 114 | J144 | PR8-WG | H17-L2 | MDCK | S207L        |

|    |      |       |         |      |       |
|----|------|-------|---------|------|-------|
| 1  | A109 | SEQ-7 | H17-L10 | MDCK | T242K |
| 2  | A110 | SEQ-7 | H17-L10 | MDCK | G240R |
| 3  | A111 | SEQ-7 | H17-L10 | MDCK | G240R |
| 4  | A112 | SEQ-7 | H17-L10 | MDCK | G240R |
| 5  | A113 | SEQ-7 | H17-L10 | MDCK | G240R |
| 6  | A114 | SEQ-7 | H17-L10 | MDCK | G173R |
| 7  | A115 | SEQ-7 | H17-L10 | MDCK | G240R |
| 8  | A116 | SEQ-7 | H17-L10 | MDCK | G240R |
| 9  | A117 | SEQ-7 | H17-L10 | MDCK | G173R |
| 10 | A118 | SEQ-7 | H17-L10 | MDCK | G240R |
| 11 | A119 | SEQ-7 | H17-L10 | MDCK | S271L |
| 12 | A120 | SEQ-7 | H17-L10 | MDCK | G240R |
| 13 | A121 | SEQ-7 | H17-L10 | MDCK | G240R |
| 14 | A122 | SEQ-7 | H17-L10 | MDCK | G240N |
| 15 | A123 | SEQ-7 | H17-L10 | MDCK | G240R |
| 16 | A124 | SEQ-7 | H17-L10 | MDCK | G240R |

|    |      |       |         |      |                     |
|----|------|-------|---------|------|---------------------|
| 17 | A125 | SEQ-7 | H17-L10 | MDCK | G240R, R262K        |
| 18 | A126 | SEQ-7 | H17-L10 | MDCK | G240R               |
| 19 | A127 | SEQ-7 | H17-L10 | MDCK | G240R               |
| 20 | A128 | SEQ-7 | H17-L10 | MDCK | G240R               |
| 21 | A129 | SEQ-7 | H17-L10 | MDCK | G240R               |
| 22 | A130 | SEQ-7 | H17-L10 | MDCK | G240R               |
| 23 | A131 | SEQ-7 | H17-L10 | MDCK | G240R               |
| 24 | A132 | SEQ-7 | H17-L10 | MDCK | G240E               |
| 25 | A133 | SEQ-7 | H17-L10 | MDCK | G240R               |
| 26 | A134 | SEQ-7 | H17-L10 | MDCK | G240R               |
| 27 | A135 | SEQ-7 | H17-L10 | MDCK | G173E               |
| 28 | A136 | SEQ-7 | H17-L10 | MDCK | G240R               |
| 29 | A137 | SEQ-7 | H17-L10 | MDCK | G240R               |
| 30 | A138 | SEQ-7 | H17-L10 | MDCK | G240R               |
| 31 | A139 | SEQ-7 | H17-L10 | MDCK | D225Y               |
| 32 | A140 | SEQ-7 | H17-L10 | MDCK | G240R               |
| 33 | A141 | SEQ-7 | H17-L10 | MDCK | N279D               |
| 34 | A142 | SEQ-7 | H17-L10 | MDCK | G240R               |
| 35 | A143 | SEQ-7 | H17-L10 | MDCK | G240R               |
| 36 | A144 | SEQ-7 | H17-L10 | MDCK | G240R               |
| 37 | K1   | SEQ-7 | H17-L10 | MDCK | G240R               |
| 38 | K2   | SEQ-7 | H17-L10 | MDCK | G173R, G240R, A257S |
| 39 | K3   | SEQ-7 | H17-L10 | MDCK | G240R               |
| 40 | K4   | SEQ-7 | H17-L10 | MDCK | G240R               |
| 41 | K5   | SEQ-7 | H17-L10 | MDCK | G240R               |
| 42 | K6   | SEQ-7 | H17-L10 | MDCK | G240R               |
| 43 | K7   | SEQ-7 | H17-L10 | MDCK | G240R               |
| 44 | K8   | SEQ-7 | H17-L10 | MDCK | G173E               |
| 45 | K9   | SEQ-7 | H17-L10 | MDCK | G240R               |
| 46 | K10  | SEQ-7 | H17-L10 | MDCK | G240R               |
| 47 | K11  | SEQ-7 | H17-L10 | MDCK | G240R               |
| 48 | K12  | SEQ-7 | H17-L10 | MDCK | G240R               |
| 49 | K13  | SEQ-7 | H17-L10 | MDCK | G240R               |
| 50 | K15  | SEQ-7 | H17-L10 | MDCK | D225G               |
| 51 | K16  | SEQ-7 | H17-L10 | MDCK | G240R               |
| 52 | K17  | SEQ-7 | H17-L10 | MDCK | G240R               |
| 53 | K19  | SEQ-7 | H17-L10 | MDCK | G240R               |
| 54 | K20  | SEQ-7 | H17-L10 | MDCK | G240R               |
| 55 | K21  | SEQ-7 | H17-L10 | MDCK | G240R               |
| 56 | K22  | SEQ-7 | H17-L10 | MDCK | G240R               |
| 57 | K23  | SEQ-7 | H17-L10 | MDCK | D225Y               |
| 58 | K24  | SEQ-7 | H17-L10 | MDCK | G240R               |
| 59 | K25  | SEQ-7 | H17-L10 | MDCK | G240R               |

|     |     |       |         |      |       |
|-----|-----|-------|---------|------|-------|
| 60  | K26 | SEQ-7 | H17-L10 | MDCK | G240R |
| 61  | K27 | SEQ-7 | H17-L10 | MDCK | G240R |
| 62  | K28 | SEQ-7 | H17-L10 | MDCK | G240R |
| 63  | K29 | SEQ-7 | H17-L10 | MDCK | G240R |
| 64  | K30 | SEQ-7 | H17-L10 | MDCK | D225Y |
| 65  | K31 | SEQ-7 | H17-L10 | MDCK | T242K |
| 66  | K32 | SEQ-7 | H17-L10 | MDCK | G173R |
| 67  | K33 | SEQ-7 | H17-L10 | MDCK | D225Y |
| 68  | K34 | SEQ-7 | H17-L10 | MDCK | G240R |
| 69  | K35 | SEQ-7 | H17-L10 | MDCK | G240R |
| 70  | K36 | SEQ-7 | H17-L10 | MDCK | G240R |
| 71  | K38 | SEQ-7 | H17-L10 | MDCK | G240R |
| 72  | K39 | SEQ-7 | H17-L10 | MDCK | G240R |
| 73  | K40 | SEQ-7 | H17-L10 | MDCK | G240R |
| 74  | K41 | SEQ-7 | H17-L10 | MDCK | G240R |
| 75  | K42 | SEQ-7 | H17-L10 | MDCK | G240R |
| 76  | K43 | SEQ-7 | H17-L10 | MDCK | T242K |
| 77  | K44 | SEQ-7 | H17-L10 | MDCK | G240R |
| 78  | K45 | SEQ-7 | H17-L10 | MDCK | G240R |
| 79  | K46 | SEQ-7 | H17-L10 | MDCK | T242K |
| 80  | K47 | SEQ-7 | H17-L10 | MDCK | G240R |
| 81  | K48 | SEQ-7 | H17-L10 | MDCK | G240R |
| 82  | K49 | SEQ-7 | H17-L10 | MDCK | G240R |
| 83  | K50 | SEQ-7 | H17-L10 | MDCK | G240R |
| 84  | K51 | SEQ-7 | H17-L10 | MDCK | G240R |
| 85  | K52 | SEQ-7 | H17-L10 | MDCK | G240R |
| 86  | K53 | SEQ-7 | H17-L10 | MDCK | G240R |
| 87  | K55 | SEQ-7 | H17-L10 | MDCK | G240R |
| 88  | K56 | SEQ-7 | H17-L10 | MDCK | G240R |
| 89  | K57 | SEQ-7 | H17-L10 | MDCK | G240R |
| 90  | K58 | SEQ-7 | H17-L10 | MDCK | G240R |
| 91  | K59 | SEQ-7 | H17-L10 | MDCK | G240R |
| 92  | K60 | SEQ-7 | H17-L10 | MDCK | G173R |
| 93  | K61 | SEQ-7 | H17-L10 | MDCK | G240R |
| 94  | K62 | SEQ-7 | H17-L10 | MDCK | G240R |
| 95  | K63 | SEQ-7 | H17-L10 | MDCK | G240R |
| 96  | K64 | SEQ-7 | H17-L10 | MDCK | G240R |
| 97  | K66 | SEQ-7 | H17-L10 | MDCK | G240R |
| 98  | K67 | SEQ-7 | H17-L10 | MDCK | G240R |
| 99  | K68 | SEQ-7 | H17-L10 | MDCK | G240R |
| 100 | K69 | SEQ-7 | H17-L10 | MDCK | G240R |
| 101 | K70 | SEQ-7 | H17-L10 | MDCK | G240R |
| 102 | K71 | SEQ-7 | H17-L10 | MDCK | G240R |

| 103 | K72 | SEQ-7 | H17-L10 | MDCK | G240R               |
|-----|-----|-------|---------|------|---------------------|
| 1   | A37 | SEQ-7 | H17-L2  | MDCK | T242K, R262K        |
| 2   | A38 | SEQ-7 | H17-L2  | MDCK | G240R, A253P        |
| 3   | A39 | SEQ-7 | H17-L2  | MDCK | G240R               |
| 4   | A40 | SEQ-7 | H17-L2  | MDCK | D225Y, R262K        |
| 5   | A41 | SEQ-7 | H17-L2  | MDCK | D225Y, A253P        |
| 6   | A42 | SEQ-7 | H17-L2  | MDCK | E219K, G240R        |
| 7   | A43 | SEQ-7 | H17-L2  | MDCK | I93T                |
| 8   | A44 | SEQ-7 | H17-L2  | MDCK | T242K               |
| 9   | A45 | SEQ-7 | H17-L2  | MDCK | G240R               |
| 10  | A46 | SEQ-7 | H17-L2  | MDCK | D225Y               |
| 11  | A47 | SEQ-7 | H17-L2  | MDCK | G240R, A253T        |
| 12  | A48 | SEQ-7 | H17-L2  | MDCK | D225Y               |
| 13  | A52 | SEQ-7 | H17-L2  | MDCK | G240R               |
| 14  | A53 | SEQ-7 | H17-L2  | MDCK | G240R               |
| 15  | A54 | SEQ-7 | H17-L2  | MDCK | G173R               |
| 16  | A55 | SEQ-7 | H17-L2  | MDCK | G173R               |
| 17  | A56 | SEQ-7 | H17-L2  | MDCK | G173R               |
| 18  | A57 | SEQ-7 | H17-L2  | MDCK | G240R               |
| 19  | A58 | SEQ-7 | H17-L2  | MDCK | G173R               |
| 20  | A59 | SEQ-7 | H17-L2  | MDCK | G240R               |
| 21  | A60 | SEQ-7 | H17-L2  | MDCK | G240R               |
| 22  | A61 | SEQ-7 | H17-L2  | MDCK | G240R               |
| 23  | A62 | SEQ-7 | H17-L2  | MDCK | G240R               |
| 24  | A63 | SEQ-7 | H17-L2  | MDCK | G240R               |
| 25  | A65 | SEQ-7 | H17-L2  | MDCK | G240R               |
| 26  | A66 | SEQ-7 | H17-L2  | MDCK | G240R               |
| 27  | A67 | SEQ-7 | H17-L2  | MDCK | G240R               |
| 28  | A68 | SEQ-7 | H17-L2  | MDCK | G240R               |
| 29  | A69 | SEQ-7 | H17-L2  | MDCK | D225Y               |
| 30  | A70 | SEQ-7 | H17-L2  | MDCK | E219K, G240R, A253T |
| 31  | A71 | SEQ-7 | H17-L2  | MDCK | D225Y               |
| 32  | A72 | SEQ-7 | H17-L2  | MDCK | G173R               |
| 33  | K73 | SEQ-7 | H17-L2  | MDCK | G240R               |
| 34  | K74 | SEQ-7 | H17-L2  | MDCK | G240R               |
| 35  | K75 | SEQ-7 | H17-L2  | MDCK | G240R               |
| 36  | K76 | SEQ-7 | H17-L2  | MDCK | G50E, G240R         |
| 37  | K77 | SEQ-7 | H17-L2  | MDCK | G240R               |
| 38  | K78 | SEQ-7 | H17-L2  | MDCK | D225G               |
| 39  | K79 | SEQ-7 | H17-L2  | MDCK | G240R               |
| 40  | K80 | SEQ-7 | H17-L2  | MDCK | G240R               |
| 41  | K81 | SEQ-7 | H17-L2  | MDCK | T242K               |

|    |        |       |        |      |              |
|----|--------|-------|--------|------|--------------|
| 42 | K82    | SEQ-7 | H17-L2 | MDCK | G240R        |
| 43 | K83    | SEQ-7 | H17-L2 | MDCK | S207P, D225Y |
| 44 | K84    | SEQ-7 | H17-L2 | MDCK | G240R        |
| 45 | K85    | SEQ-7 | H17-L2 | MDCK | G240R        |
| 46 | K86    | SEQ-7 | H17-L2 | MDCK | T242K        |
| 47 | K87    | SEQ-7 | H17-L2 | MDCK | G240R        |
| 48 | K88    | SEQ-7 | H17-L2 | MDCK | G240E        |
| 49 | K89    | SEQ-7 | H17-L2 | MDCK | D225Y        |
| 50 | K90    | SEQ-7 | H17-L2 | MDCK | G240R        |
| 51 | K91    | SEQ-7 | H17-L2 | MDCK | D225Y        |
| 52 | K92    | SEQ-7 | H17-L2 | MDCK | G240R        |
| 53 | K93    | SEQ-7 | H17-L2 | MDCK | D225Y        |
| 54 | K94    | SEQ-7 | H17-L2 | MDCK | G240R        |
| 55 | K95    | SEQ-7 | H17-L2 | MDCK | D225Y        |
| 56 | K96    | SEQ-7 | H17-L2 | MDCK | T242K        |
| 57 | K121   | SEQ-7 | H17-L2 | MDCK | G240R        |
| 58 | K122   | SEQ-7 | H17-L2 | MDCK | D225Y        |
| 59 | K123   | SEQ-7 | H17-L2 | MDCK | G240R        |
| 60 | K124   | SEQ-7 | H17-L2 | MDCK | D225Y        |
| 61 | K125   | SEQ-7 | H17-L2 | MDCK | G240R        |
| 62 | K126   | SEQ-7 | H17-L2 | MDCK | G240R        |
| 63 | K127   | SEQ-7 | H17-L2 | MDCK | G240R        |
| 64 | K128   | SEQ-7 | H17-L2 | MDCK | G240R        |
| 65 | K129   | SEQ-7 | H17-L2 | MDCK | G240R        |
| 66 | K130   | SEQ-7 | H17-L2 | MDCK | D225Y        |
| 67 | K131   | SEQ-7 | H17-L2 | MDCK | G240R        |
| 68 | K132   | SEQ-7 | H17-L2 | MDCK | V169M        |
| 69 | K133   | SEQ-7 | H17-L2 | MDCK | G173E        |
| 70 | K134   | SEQ-7 | H17-L2 | MDCK | G140R        |
| 71 | K135   | SEQ-7 | H17-L2 | MDCK | G240E        |
| 72 | K136   | SEQ-7 | H17-L2 | MDCK | G240R        |
| 73 | K137   | SEQ-7 | H17-L2 | MDCK | G240R        |
| 74 | K139   | SEQ-7 | H17-L2 | MDCK | G240R        |
| 75 | K140   | SEQ-7 | H17-L2 | MDCK | G240R, A253P |
| 76 | K141   | SEQ-7 | H17-L2 | MDCK | G240R        |
| 77 | K142   | SEQ-7 | H17-L2 | MDCK | G240R        |
| 78 | K143   | SEQ-7 | H17-L2 | MDCK | D225Y        |
| 79 | K144   | SEQ-7 | H17-L2 | MDCK | D225Y        |
| 80 | SEQ-A1 | SEQ-7 | H17-L2 | MDCK | N197D        |
| 81 | SEQ-A2 | SEQ-7 | H17-L2 | MDCK | T242K        |
| 82 | SEQ-A3 | SEQ-7 | H17-L2 | MDCK | D225G        |
| 83 | SEQ-A4 | SEQ-7 | H17-L2 | MDCK | D225G        |
| 84 | SEQ-A5 | SEQ-7 | H17-L2 | MDCK | G240E        |

|    |        |       |        |      |       |
|----|--------|-------|--------|------|-------|
| 85 | SEQ-A6 | SEQ-7 | H17-L2 | MDCK | G240R |
| 86 | SEQ-A7 | SEQ-7 | H17-L2 | MDCK | A253P |
| 87 | SEQ-A8 | SEQ-7 | H17-L2 | MDCK | G240R |
| 88 | SEQ-A8 | SEQ-7 | H17-L2 | MDCK | G240R |
| 89 | SEQ-A8 | SEQ-7 | H17-L2 | MDCK | G240R |

|    |     |       |         |      |              |
|----|-----|-------|---------|------|--------------|
| 1  | D40 | SEQ-8 | H17-L10 | MDCK | G240E        |
| 2  | D43 | SEQ-8 | H17-L10 | MDCK | G240E        |
| 3  | D44 | SEQ-8 | H17-L10 | MDCK | I93T         |
| 4  | D45 | SEQ-8 | H17-L10 | MDCK | I93T         |
| 5  | D46 | SEQ-8 | H17-L10 | MDCK | K172T        |
| 6  | D48 | SEQ-8 | H17-L10 | MDCK | G240E        |
| 7  | D50 | SEQ-8 | H17-L10 | MDCK | V169M        |
| 8  | D51 | SEQ-8 | H17-L10 | MDCK | I93T         |
| 9  | D53 | SEQ-8 | H17-L10 | MDCK | V169M        |
| 10 | D54 | SEQ-8 | H17-L10 | MDCK | G173R        |
| 11 | D55 | SEQ-8 | H17-L10 | MDCK | G240R        |
| 12 | D57 | SEQ-8 | H17-L10 | MDCK | G173R        |
| 13 | D58 | SEQ-8 | H17-L10 | MDCK | G173R        |
| 14 | D60 | SEQ-8 | H17-L10 | MDCK | G173R        |
| 15 | D62 | SEQ-8 | H17-L10 | MDCK | K238T        |
| 16 | D63 | SEQ-8 | H17-L10 | MDCK | G240E        |
| 17 | D65 | SEQ-8 | H17-L10 | MDCK | K172T        |
| 18 | D66 | SEQ-8 | H17-L10 | MDCK | I93T         |
| 19 | D68 | SEQ-8 | H17-L10 | MDCK | G268R        |
| 20 | D72 | SEQ-8 | H17-L10 | MDCK | S207A        |
| 21 | E13 | SEQ-8 | H17-L10 | MDCK | G173R        |
| 22 | E14 | SEQ-8 | H17-L10 | MDCK | S125P        |
| 23 | E15 | SEQ-8 | H17-L10 | MDCK | D241N        |
| 24 | E16 | SEQ-8 | H17-L10 | MDCK | G173R        |
| 25 | E17 | SEQ-8 | H17-L10 | MDCK | G173R        |
| 26 | E18 | SEQ-8 | H17-L10 | MDCK | N210S        |
| 27 | E21 | SEQ-8 | H17-L10 | MDCK | I93T         |
| 28 | E26 | SEQ-8 | H17-L10 | MDCK | K222Q, G240R |
| 29 | E28 | SEQ-8 | H17-L10 | MDCK | D241N        |
| 30 | E29 | SEQ-8 | H17-L10 | MDCK | T235N        |
| 31 | E30 | SEQ-8 | H17-L10 | MDCK | N210S        |
| 32 | E34 | SEQ-8 | H17-L10 | MDCK | S266N        |
| 33 | E35 | SEQ-8 | H17-L10 | MDCK | N210H        |
| 34 | E36 | SEQ-8 | H17-L10 | MDCK | G173R        |
| 35 | E37 | SEQ-8 | H17-L10 | MDCK | Q191T, A253T |
| 36 | E38 | SEQ-8 | H17-L10 | MDCK | N210S        |
| 37 | E39 | SEQ-8 | H17-L10 | MDCK | N210S        |

|    |     |       |         |      |              |
|----|-----|-------|---------|------|--------------|
| 38 | E44 | SEQ-8 | H17-L10 | MDCK | G173R        |
| 39 | E45 | SEQ-8 | H17-L10 | MDCK | A253T        |
| 40 | E46 | SEQ-8 | H17-L10 | MDCK | K222Q, A253T |
| 41 | E47 | SEQ-8 | H17-L10 | MDCK | K222Q, G240E |
